# Supplementary material
Source: PubMed Central journal article supplement (PMC9444936)

## Supplementary Figures

**Fig. S1.** E-QTL violin-plots of *MTHFR* tag SNPs associated with risk of TGCT in meta-analysis and of other *MTHFR* SNPs in high LD. Upper panel: e-QTL violin-plots of SNPs rs12121543 (left) and rs1476413 (right) showing *MTHFR* expression level in human adult testis tissue according to the distributions of the three genotypes: homozygous reference, heterozygous, and homozygous alternative allele. Lower panel: e-QTL violin-plots of SNPs in high LD with rs12121543 and rs1476413, respectively: rs3818762 (left) and rs1023252 (right).

Data Source: GTEx Analysis Release V7 (dbGaP Accession phs000424.v7.p2)

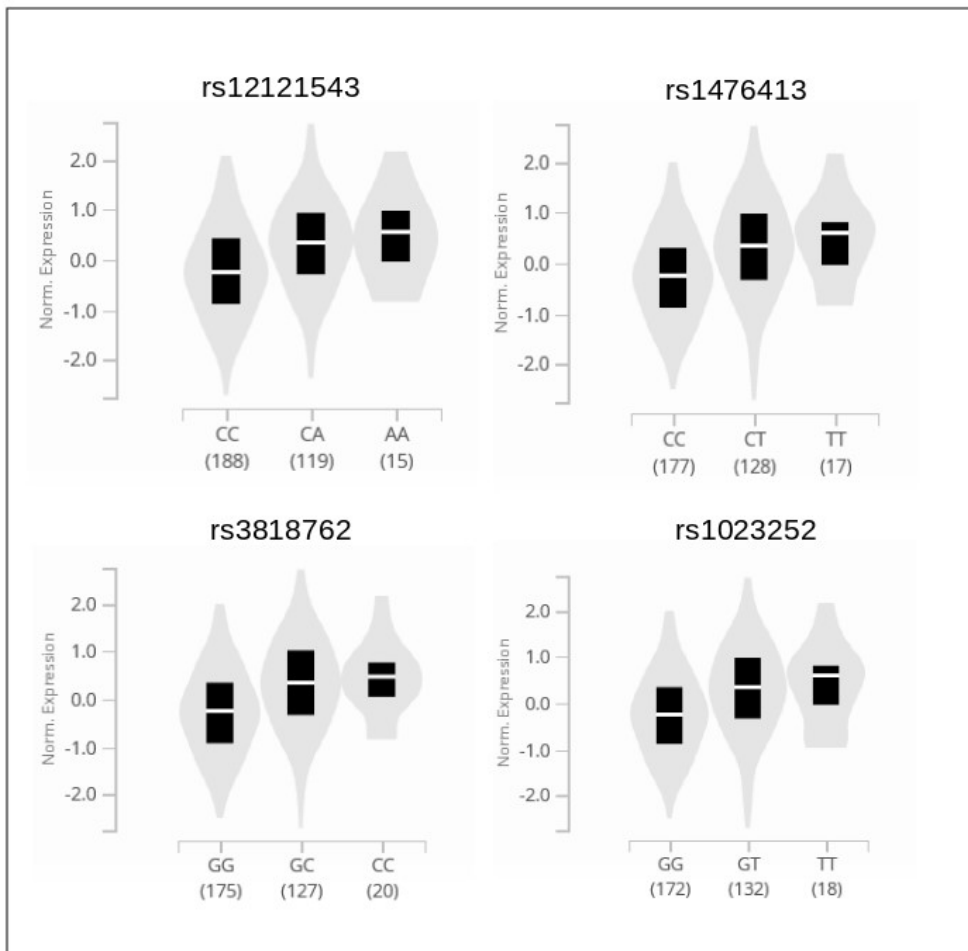

Supplement: NIHMS1816990-supplement-2.pdf [file NIHMS1816990-supplement-2.pdf]
